# Supplementary material for: Proteostasis perturbation of N-Myc leveraging HSP70 mediated protein turnover improves treatment of neuroendocrine prostate cancer
Source: PubMed Central journal article supplement (PMC11300456; doi:10.1038/s41467-024-50459-x), 2024-08-05
Supplement: 41467_2024_50459_MOESM1_ESM.pdf [file 41467_2024_50459_MOESM1_ESM.pdf]

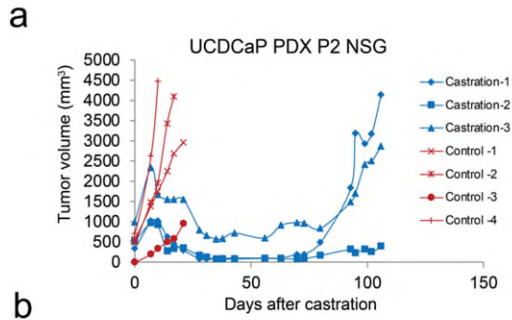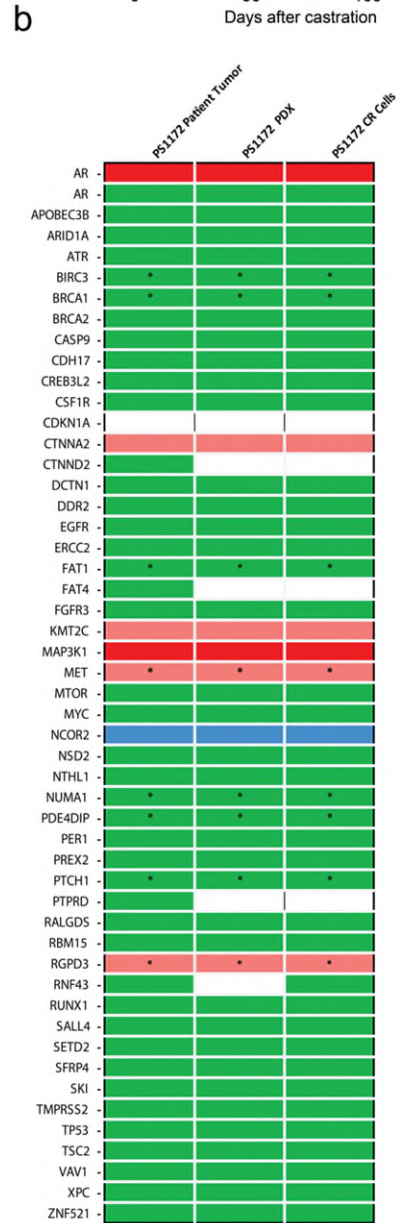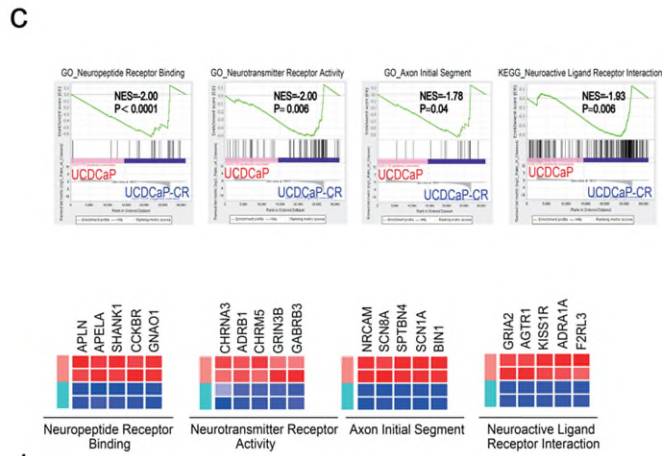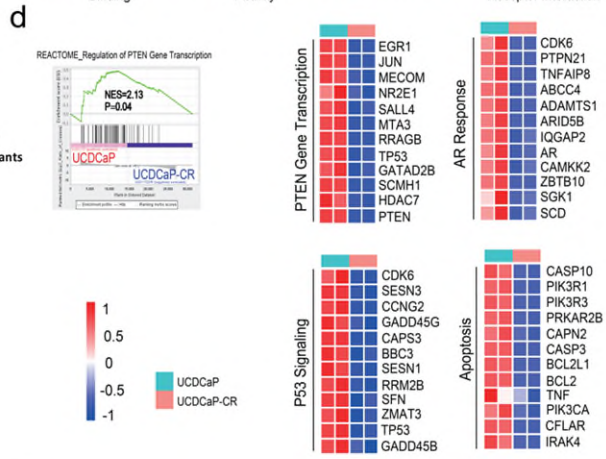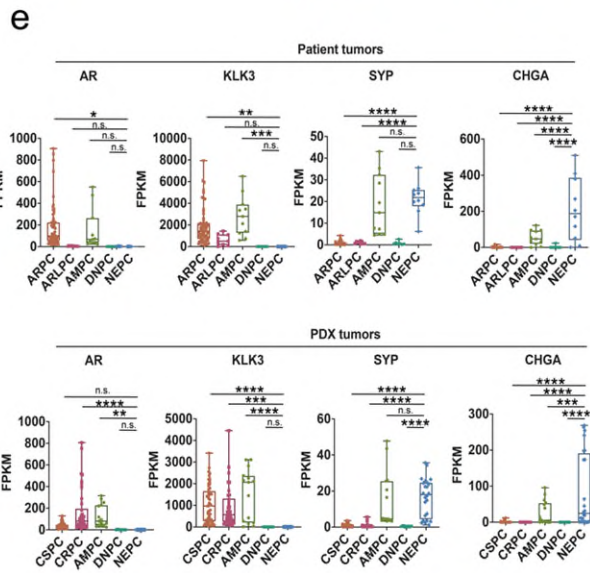

**Supplementary Fig. 1 Long-term androgen-deprivation patient derived prostate xenograft tumor exhibits neural lineage plasticity and overexpresses N-Myc.** **a** Tumor growth curves of the second passage of UCDCaP patient derived xenograft (PDX) with (n=4) or without (n=3) castration over three months of period. **b** Representative mutations found in UCDCaP patient tumor, PDX, and cells. **c** Gene Set Enrichment Analysis (GSEA) of the gene signatures up or down regulated in UCDCaP-CR cells compared with UCDCaP cells. The signature was defined by genes that are preferentially upregulated in the neuropeptide receptor binding, neurotransmitter receptor activity, axon initial segment and neuroactive ligand receptor interaction pathways. **d** GSEA of the PTEN gene transcription signatures were downregulated in UCDCaP-CR. Heatmap showing the up-regulation or down-regulation of genes related to these signaling pathways, as well as the AR response, P53 signaling, apoptosis pathways. **e** The mRNA expression of AR, KLK3, SYP, and CHGA were analyzed in patients' samples (n=96) and PDX samples (n=145). Center: median; box: 25th to 75th interquartile range (IQR); whiskers: 1.5× IQR; outliers: individual data points; statistical significance determined by one-way ANOVA with a Tukey multiple-comparison test. AR-high prostate cancer (ARPC), AR-low prostate cancer (ARLPC), amphicrine prostate cancer (AMPC), double negative prostate cancer (DNPC), castration-sensitive prostate cancer (CSPC), castration-resistant prostate cancer (CRPC). *n.s.* not significant; \* $p < 0.05$ ; \*\* $p < 0.01$ ; \*\*\* $p < 0.001$ ; and \*\*\*\* $p < 0.0001$ . Source data are provided as a Source Data file.

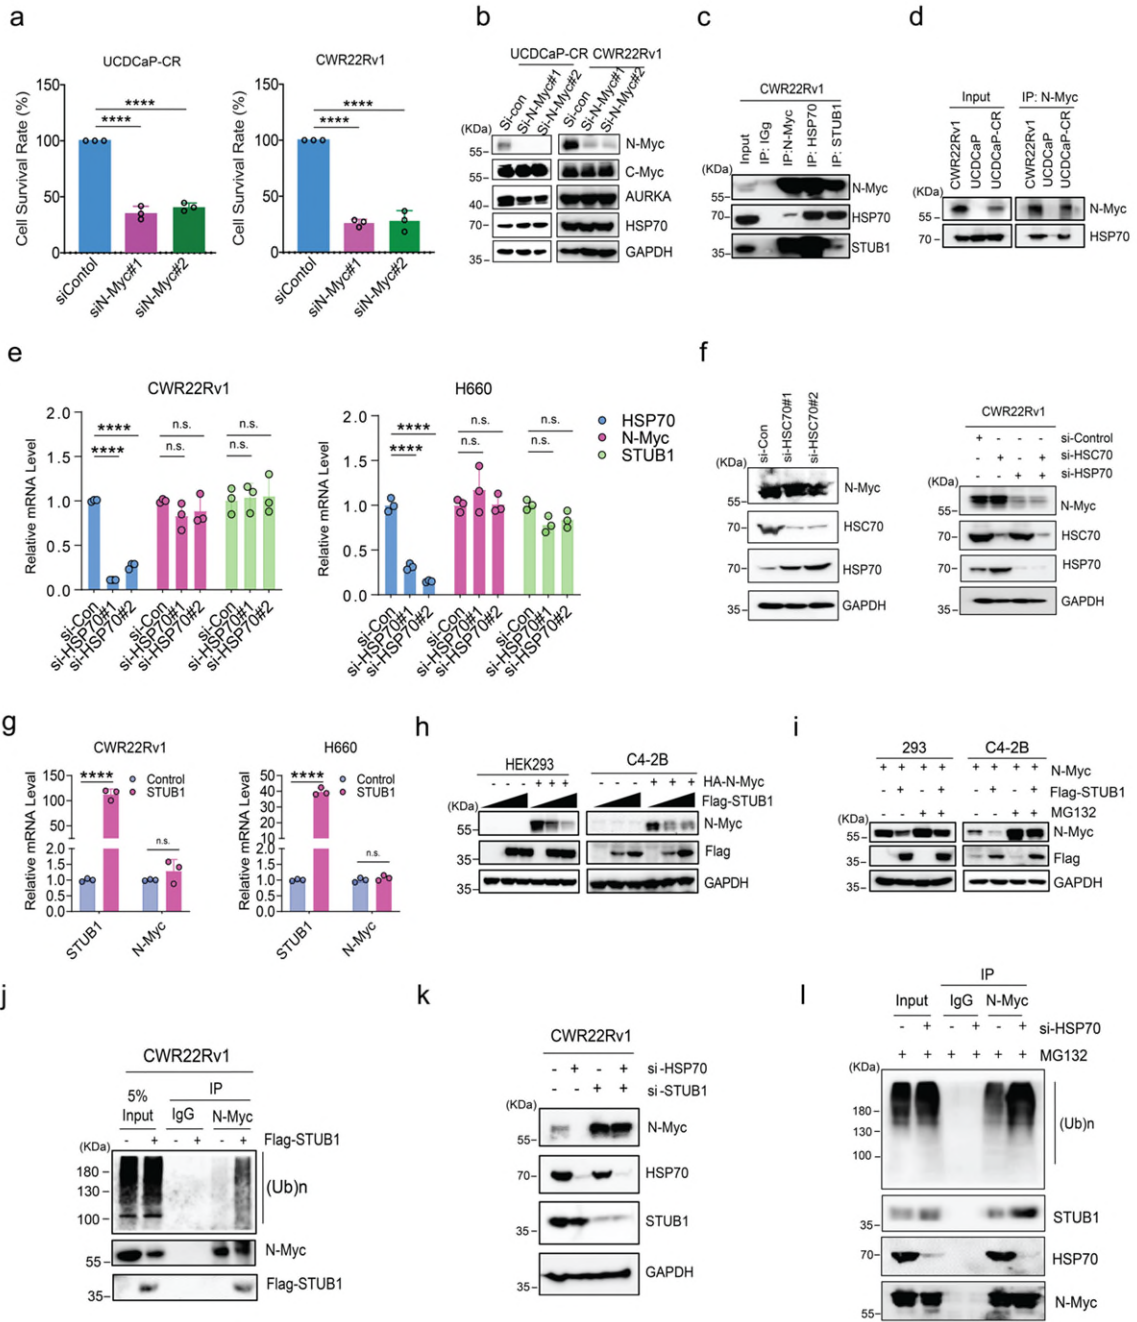

**Supplementary Fig. 2 HSP70/STUB1 controls N-Myc protein levels through ubiquitin proteasome system.** **a, b** UCDCaP-CR and CWR22Rv1 cells were transfected with siRNA against N-Myc or negative control for 7 days. The cell proliferation (**a**,  $n = 3$  samples) and N-Myc, c-Myc, AURKA, HSP70, and GAPDH protein expression (**b**) were assessed. **c** The whole cell lysates from CWR22Rv1 cells were immunoprecipitated with anti-N-Myc, anti-HSP70, anti-STUB1, or anti-IgG antibodies and probed for N-Myc, HSP70 and STUB1, respectively. **d** The whole cell lysates from CWR22Rv1, UCDCaP, and UCDCaP-CR cells were immunoprecipitated with anti-N-Myc antibody and probed for N-Myc and HSP70. **e** The mRNA expression of HSP70, N-Myc, and STUB1 was assessed in H660 and CWR22Rv1 cells transfected with siRNA against HSP70 or negative control for 7 days ( $n = 3$  samples). **f** CWR22Rv1 cells were transfected with siHSC70 #1 and #2 (left) for 3 days, and the levels of N-Myc, HSC70, and HSP70 were examined by western blotting with GAPDH as the internal control. CWR22Rv1 cells were transfected with siHSC70, siHSP70, or both (right) for 3 days and the levels of N-Myc, HSC70, and HSP70 were assessed. **g** The mRNA expression of STUB1 and N-Myc was determined after H660 and CWR22Rv1 cells transfected with 4 $\mu$ g of Flag-STUB1 plasmids for 3 days ( $n = 3$  samples). **h** HEK293 and C4-2B cells were transfected with HA-N-Myc with or without 0, 2 $\mu$ g, or 4 $\mu$ g Flag-STUB1 plasmids for 3 days. The protein expression of N-Myc was determined. **i**, HEK293 and C4-2B cells were co-transfected with HA-N-Myc and Flag-STUB1 plasmids for 3 days and then treated with or without MG132 (5  $\mu$ M) for 6 hours. The expression of N-Myc was determined by western blotting. **j** CWR22Rv1 cells were transfected with Flag-STUB1 plasmids for 3 days. Immunoprecipitation was performed with an anti-N-Myc antibody and probed for ubiquitin, N-Myc, and Flag-STUB1, respectively. **k** CWR22Rv1 cells were treated with siHSP70, siSTUB1 or both and the expressions of N-Myc, HSP70 and STUB1 were determined by western blots. **l** CWR22Rv1 cells were transfected with siHSP70 for 3 days, and then treated with 5  $\mu$ M MG132 overnight. Immunoprecipitation was performed with an anti-N-Myc antibody and probed for ubiquitin, STUB1, HSP70 and N-Myc, respectively. Results are the mean of three independent experiments ( $\pm$  S.D.). For **a** and **e**, statistical significance determined by one-way ANOVA with a Tukey multiple-comparison test. For **g**, statistical significance determined by unpaired two-sided t-test. Results are the mean of three independent experiments ( $\pm$  S.D.). *n.s.* not significant; \*\*\*\* $p < 0.0001$ . Source data are provided as a Source Data file.

**a**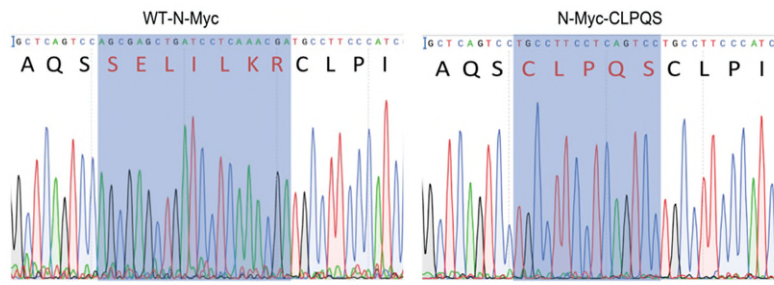**b**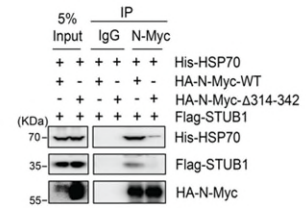**c**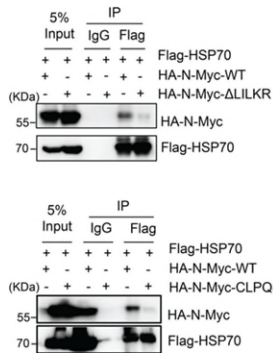**d**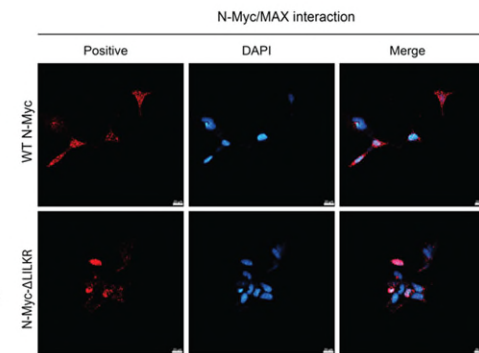**e**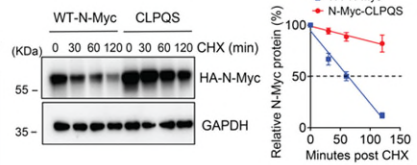**f**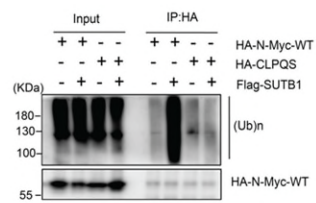**g**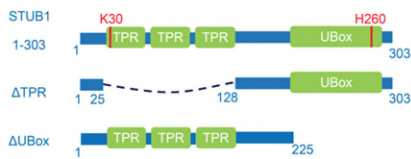**h**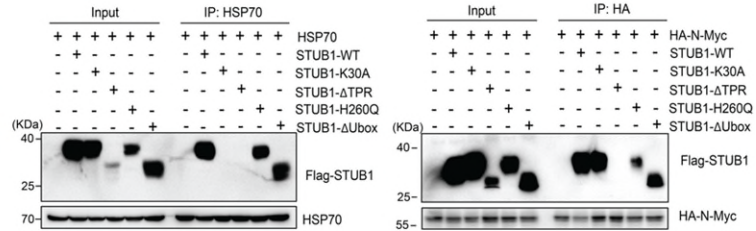

**Supplementary Fig. 3 HSP70 and STUB1 affects and directly interacts with N-Myc domain.** **a** The Sanger Sequence Chromatogram of wild-type (WT) N-Myc and N-Myc-CLPQS plasmids. **b** HEK293 cells were co-transfected with His-HSP70 and Flag-STUB1 with or without HA-WT-N-Myc or HA-N-Myc- $\Delta$ 314-342. Whole cell lysates were immunoprecipitated with anti-N-Myc antibody and probed for His-HSP70, Flag-STUB1 and HA-N-Myc, respectively. IgG antibodies were used as the negative control and whole lysate input were loaded alongside. **c** HEK293 cells were co-transfected with Flag-HSP70, HA-WT-N-Myc, HA-N-Myc- $\Delta$ LILKR, or HA-N-Myc-CLPQS. Whole cell lysates were immunoprecipitated with anti-Flag antibodies and probed for Flag-HSP70 and HA-N-Myc, respectively. **d** HEK293 cells were co-transfected with WT-N-Myc or N-Myc- $\Delta$ LILKR, with Max for 3 days, and the interaction of wild type and mutant N-Myc and Max was determined by PLA. Scale bar represents 20 microns. **e** HEK293 cells were transfected with HA-WT-N-Myc or HA-N-Myc-CLPQS and treated with 50  $\mu$ g/ml cycloheximide for 0, 30, 60, and 120 minutes. Whole cell lysates were separated by electrophoresis and blotted with HA, and the half-life of N-Myc was calculated (n = 3 independent experiments and data are presented as mean  $\pm$  S.D.). **f** HEK293 cells were co-transfected with HA-WT-N-Myc, HA-N-Myc-CLPQS, and Flag-STUB1. Whole cell lysates were immunoprecipitated with anti-HA antibodies and probed for ubiquitin and HA-N-Myc. **g** Schematic representations of STUB1 point mutations or deletion mutants used for the domain mapping. **h** HEK293 cells were co-transfected with Flag-WT-STUB1 or mutants with HSP70 or HA-N-Myc. Whole cell lysates were immunoprecipitated with the anti-HSP70 or anti-HA antibodies and immunoblotted with the Flag, HSP70, or HA antibodies. Source data are provided as a Source Data file.



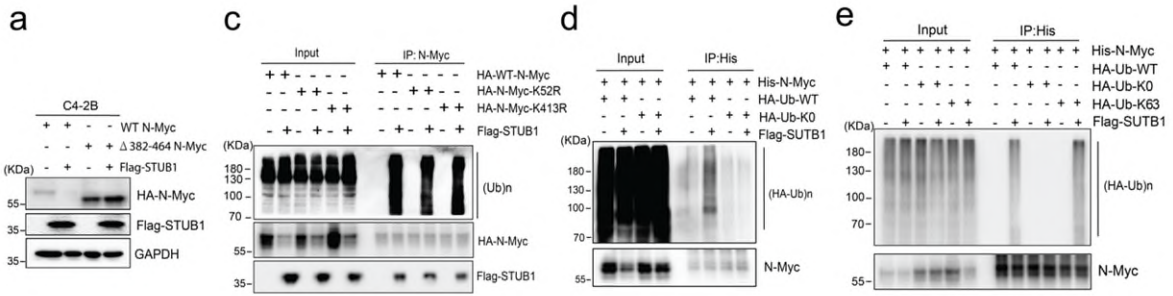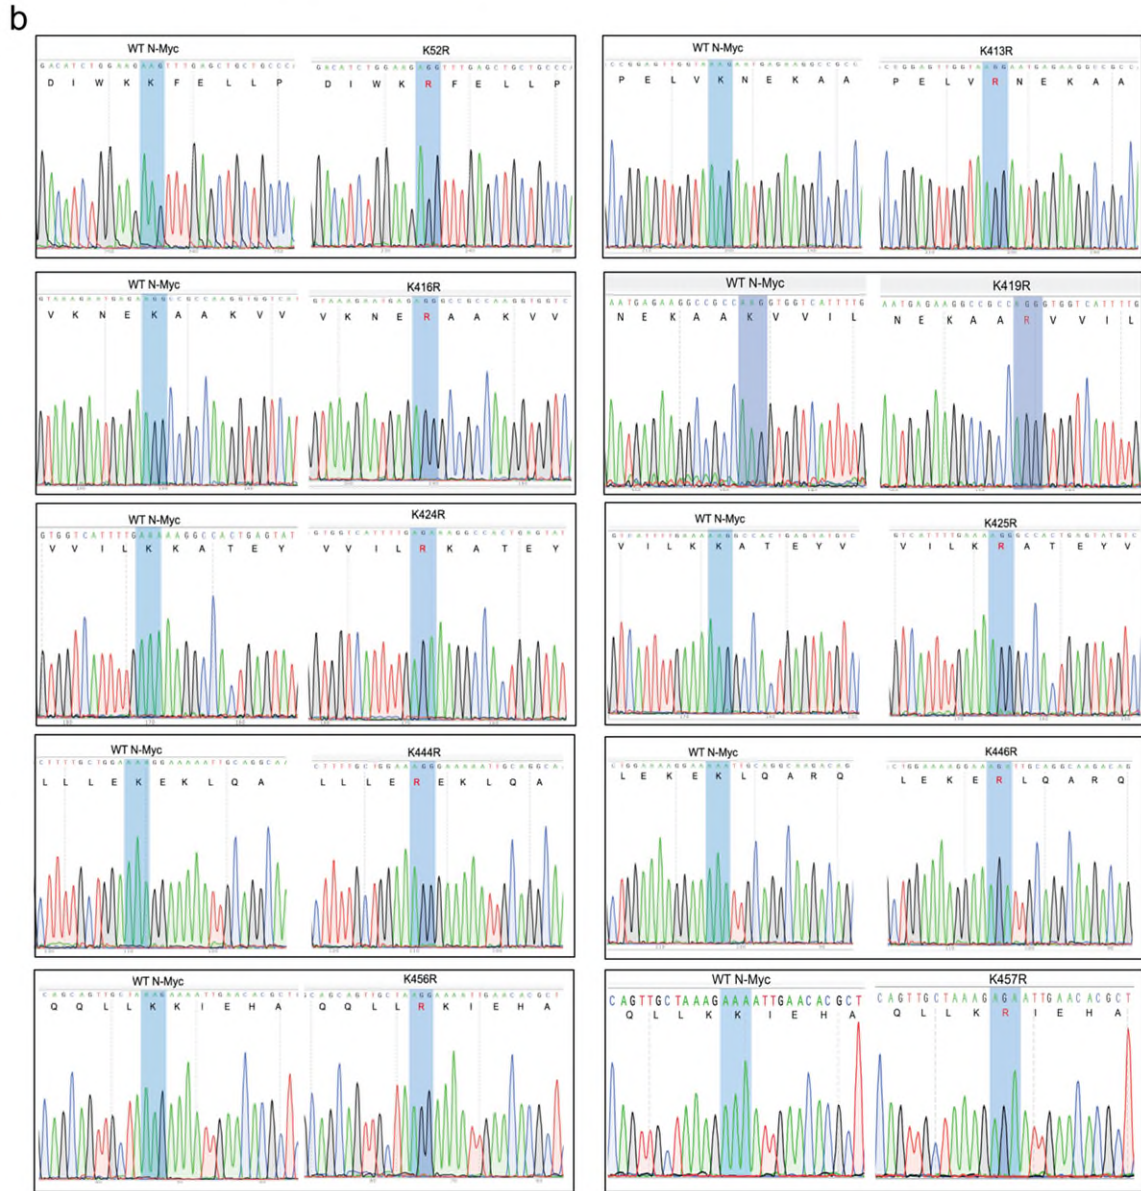

**Supplementary Fig. 4 STUB1 coordinates with HSP70 in regulating N-Myc polyubiquitination and degradation.** **a** C4-2B cells were co-transfected with HA-WT-N-Myc or  $\Delta$ 382-464-N-Myc with or without Flag-STUB1. The expression of N-Myc was determined by western blotting. **b** The Sanger Sequence chromatogram of wild-type (WT) N-Myc and eight mutant plasmids (K52R, K413R, K416R, K419R, K424R, K425R, K444R, K446R, K456R, and K457R). **c** HEK293 cells were co-transfected with HA-WT-N-Myc or mutants (K52R, K413R) with and without Flag-STUB1. Whole cell lysates were immunoprecipitated with anti-N-Myc antibodies and blotted with ubiquitin, Flag, or HA antibodies. **d** HEK293 cells were co-transfected with His-N-Myc, HA-WT-Ubiquitin or HA-Ubiquitin-K0 and Flag-STUB1. The cell lysates were immunoprecipitated with the anti-His antibody and blotted with anti-HA or N-Myc antibodies. **e** HEK293 cells were co-transfected with His-N-Myc, HA-WT-Ubiquitin or HA-Ubiquitin-K0 or HA-Ubiquitin-K63 with and without Flag-STUB1. Whole cell lysates were immunoprecipitated with anti-His antibodies and blotted with HA and N-Myc antibodies. Source data are provided as a Source Data file.



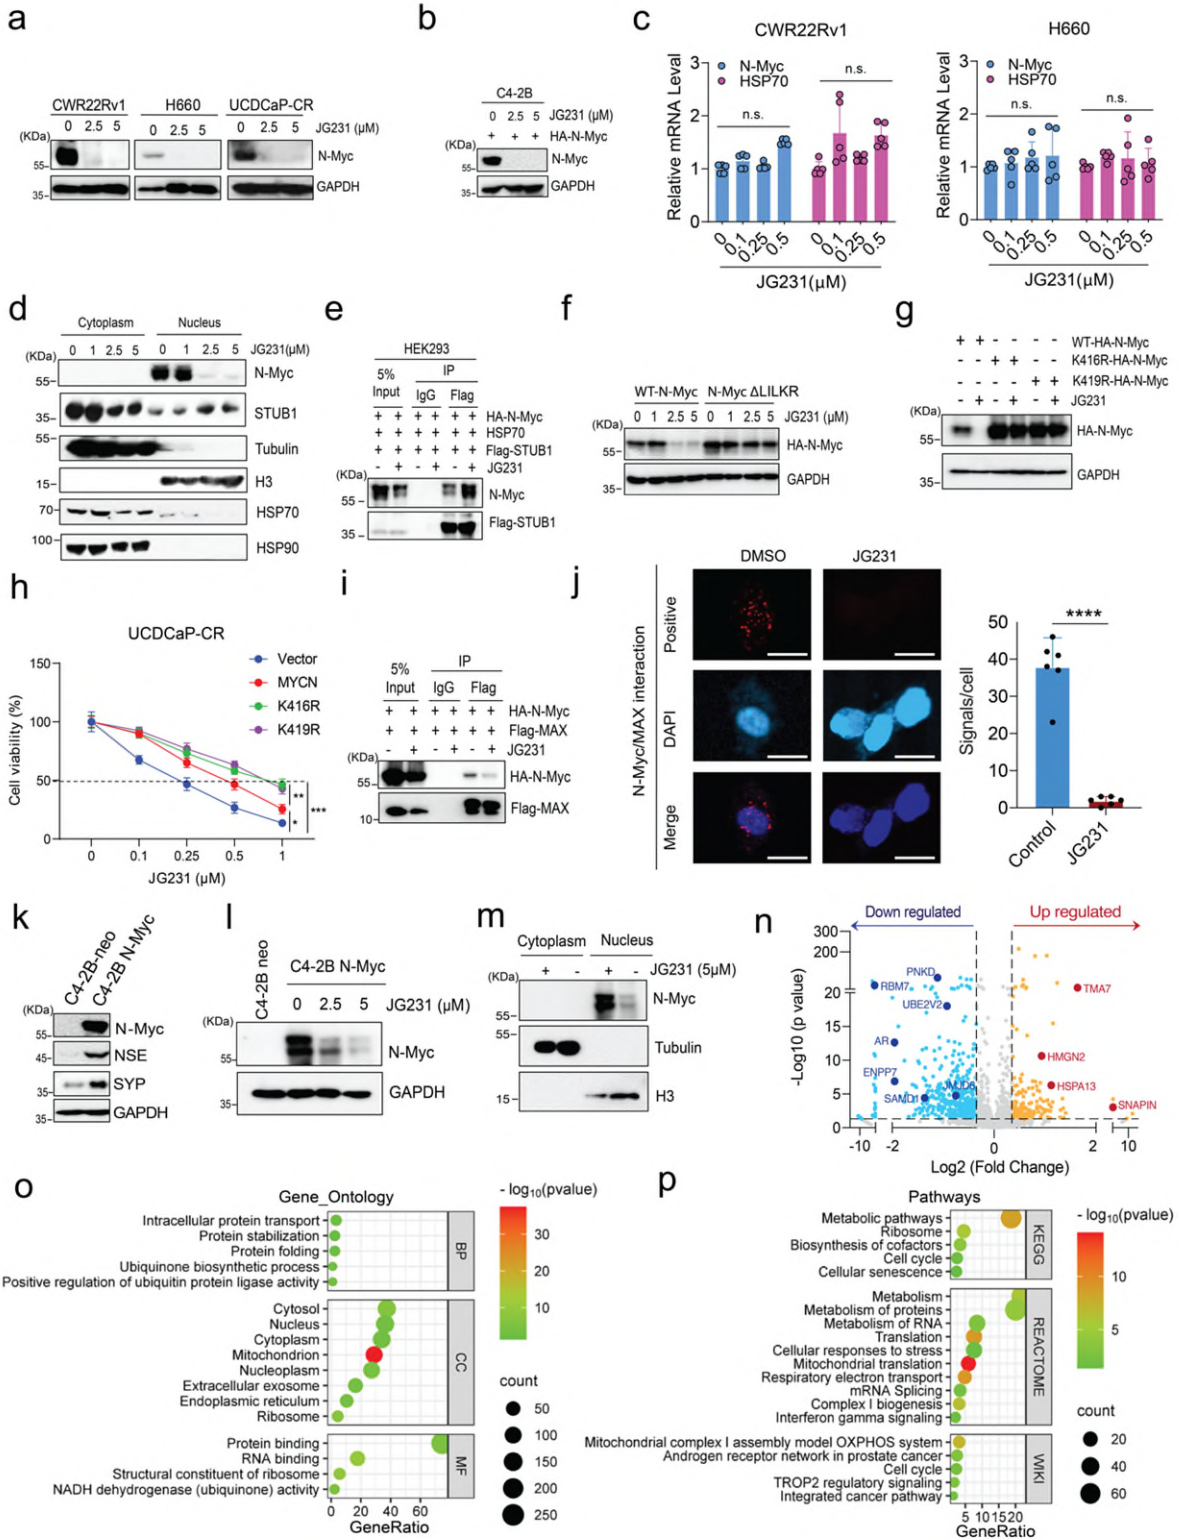

**Supplementary Fig. 5 Pharmacologically targeting HSP70 degrades N-Myc expression via STUB1.** **a** CWR22Rv1, H660, and UCDCaP-CR cells were treated with JG231 (0, 2.5, or 5  $\mu$ M) for 24 hours and whole cell lysates were separated by electrophoresis and probed for N-Myc and GAPDH antibodies. **b** C4-2B cells were transfected with HA-N-Myc plasmids for 2 days and then cells were treated with JG231 (0, 2.5, or 5  $\mu$ M) for 24 hours. Whole cell lysates were collected and subjected to western blotting (left). **c** CWR22Rv1 and H660 cells were treated with JG231 (0, 0.1, 0.25, or 0.5  $\mu$ M) for 3 days. The mRNA expression of N-Myc and HSP70 was determined by RT-PCR (n = 5 samples). **d** Western blotting results showed the cytoplasmic and nuclear expression of N-Myc, STUB1, HSP70, and HSP90 in CWR22Rv1 cells treated with or without JG231 (1, 2.5, and 5  $\mu$ M) for 24 hours. Tubulin and Histone-H3 were used as the loading controls for cytoplasm and nuclei, respectively. **e** HEK293 cells were co-transfected with HA-N-Myc, HSP70 and Flag-STUB1 expression constructs for 3 days, then cells were treated with JG231 (2.5  $\mu$ M) for 24 hours. Whole cell lysates were harvested and immunoprecipitated with the Flag antibody and blotted with anti-Flag, and anti-N-Myc antibodies. **f** HEK293 cells were transfected with WT-N-Myc or N-Myc-  $\Delta$ LILKR plasmids for 3 days, and then treated with JG231 (0, 1, 2.5 and 5  $\mu$ M) for 24 hours. N-Myc expression was determined by western blotting. **g** HEK293 cells were transfected with WT-N-Myc, N-Myc-K416R, or N-Myc-K419R plasmids for 3 days, and then treated with JG231 (2.5  $\mu$ M) for 24 hours. N-Myc expression was determined by western blotting. **h** UCDCaP-CR cells were transfected with vector, WT-MYCN, K416R-MYCN, or K419R-MYCN for 24 hours, following treatment with different doses of JG231 for 3 days, the cell viability was determined (n = 3 samples). **i** HEK293 cells were co-transfected with HA-N-Myc and Flag-MAX plasmids for 3 days, and then treated with JG231 (2.5  $\mu$ M) for 24 hours. Western blotting was performed after cell lysates were precipitated with anti-Flag or IgG antibodies and probed for the detection of HA-N-Myc and Flag-MAX. **j** The PLA for N-Myc and MAX interaction after treatment of CWR22Rv1 cells with JG231 (2.5  $\mu$ M) for 24 hours. Red signals represent the proximity of the N-Myc and MAX proteins. DNA is stained with DAPI. Quantification of the PLA signals per cell after treatment with the different compounds (n = 6). **k** The protein expressions of N-Myc, NSE, and SYP in C4-2B neo and C4-2B N-Myc cells were determined by western blotting. **l** C4-2B N-Myc cells were treated JG231 (0, 2.5, and 5  $\mu$ M) for 4 hours, the expression of N-Myc was determined. C4-2B neo was set up as negative control. **m** Western blotting results showed the cytoplasmic and nuclear expression of N-Myc in C4-2B N-Myc cells treated with or without JG231 (0 and 5  $\mu$ M) for 4 hours. Tubulin and Histone-H3 were used as the loading controls for cytoplasm and nuclei, respectively. **n** Volcano plot displaying up-regulated

proteins (in yellow and red) and down-regulated proteins (in blue) from whole cell lysates following JG231 treatment in C4-2B N-Myc cells, in comparison with DMSO treatment. **o, p** Gene Ontology and pathway analyses demonstrate the enrichment of functional annotations in down-regulated proteins in whole-cell lysates from C4-2B N-Myc cells treated with 5  $\mu$ M JG231 for 4 hours. Results are the mean of three independent experiments ( $\pm$  S.D.). For **c**, statistical significance determined by one-way ANOVA with a Tukey multiple-comparison test. For **h** and **j**, statistical significance determined by unpaired two-sided t-test. \* $p < 0.05$ ; \*\* $p < 0.01$ ; \*\*\* $p < 0.001$ ; *n.s.* not significant. Source data are provided as a Source Data file.

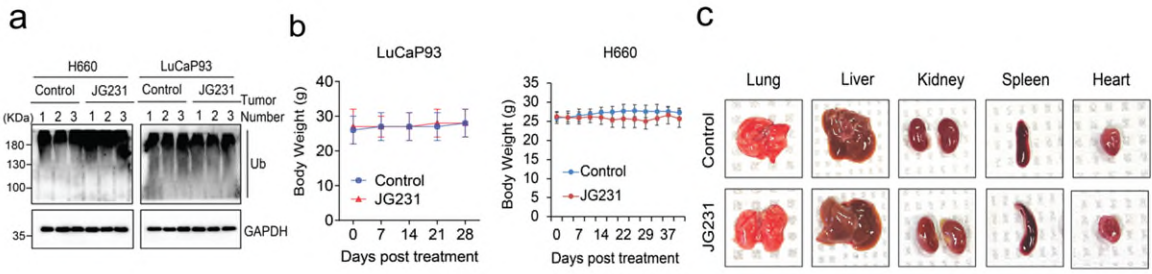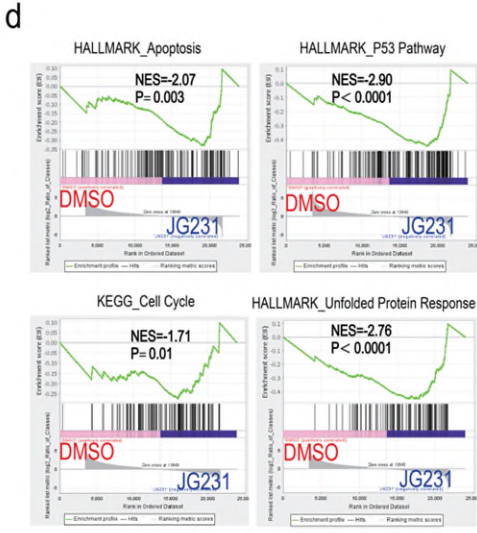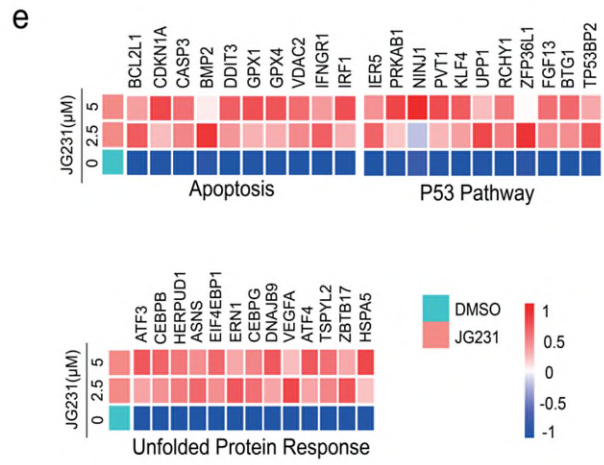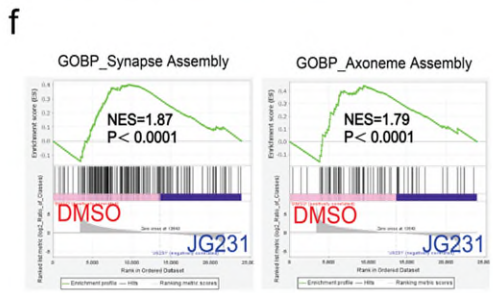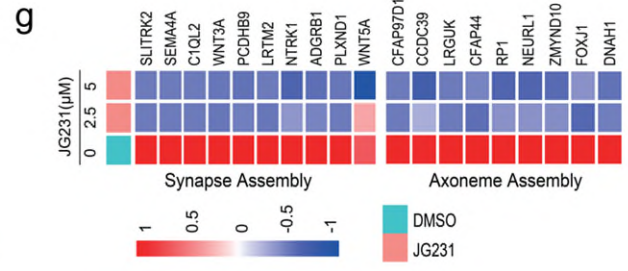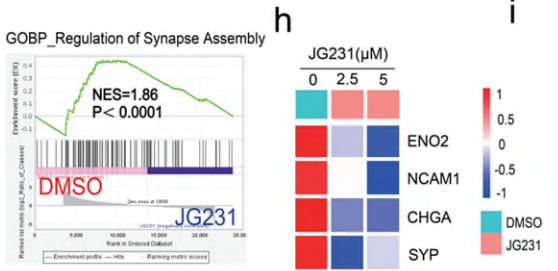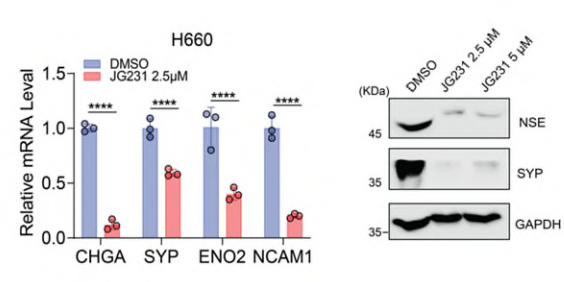

**Supplementary Fig. 6 HSP70 inhibitor JG231 suppresses NEPC xenograft tumor growth.**

**a** Western blot of representative tumors from LuCaP93 and H660 models treated with or without JG231 probed by anti-Ub antibodies. **b** Mice body weight of control and JG231 treated groups in LuCaP93 (n=9) and H660 models (n=6). **c** Representative mouse organ morphology pictures of control and JG231 treated groups in LuCaP93 model. **d** GSEA of the apoptosis, P53 pathway, cell cycle, and unfolded protein response pathways were upregulated in H660 cells treated with JG231. **e** Heatmap showing genes for the apoptosis, P53 pathway, cell cycle, and unfolded protein response were upregulated in H660 cells after JG231 treatment. **f** GSEA of the synapse assembly, axoneme assembly, and regulation of synapse assembly pathways were downregulated in H660 cells treated with JG231. **g** Heatmap showing both genes for the synapse assembly and axoneme assembly were downregulated in H660 cells after JG231 treatment. **h** Heatmap showing genes for the downregulated neuroendocrine (NE) features in H660 cells treated with JG231. **i** The mRNA expression of CHGA, SYP, ENO2, and NCAM1 was assessed in H660 cells treated with JG231 (2.5  $\mu$ M) for 24 hours (left, n = 3 samples, statistical significance determined by unpaired two-sided t-test). The protein expression of SYP and ENO2 was assessed in H660 cells treated with JG231 (0, 2.5, and 5 $\mu$ M) for 24 hours (right). Results are the mean of three independent experiments ( $\pm$  S.D.). \*\*\*\* $p < 0.0001$ . Source data are provided as a Source Data file.



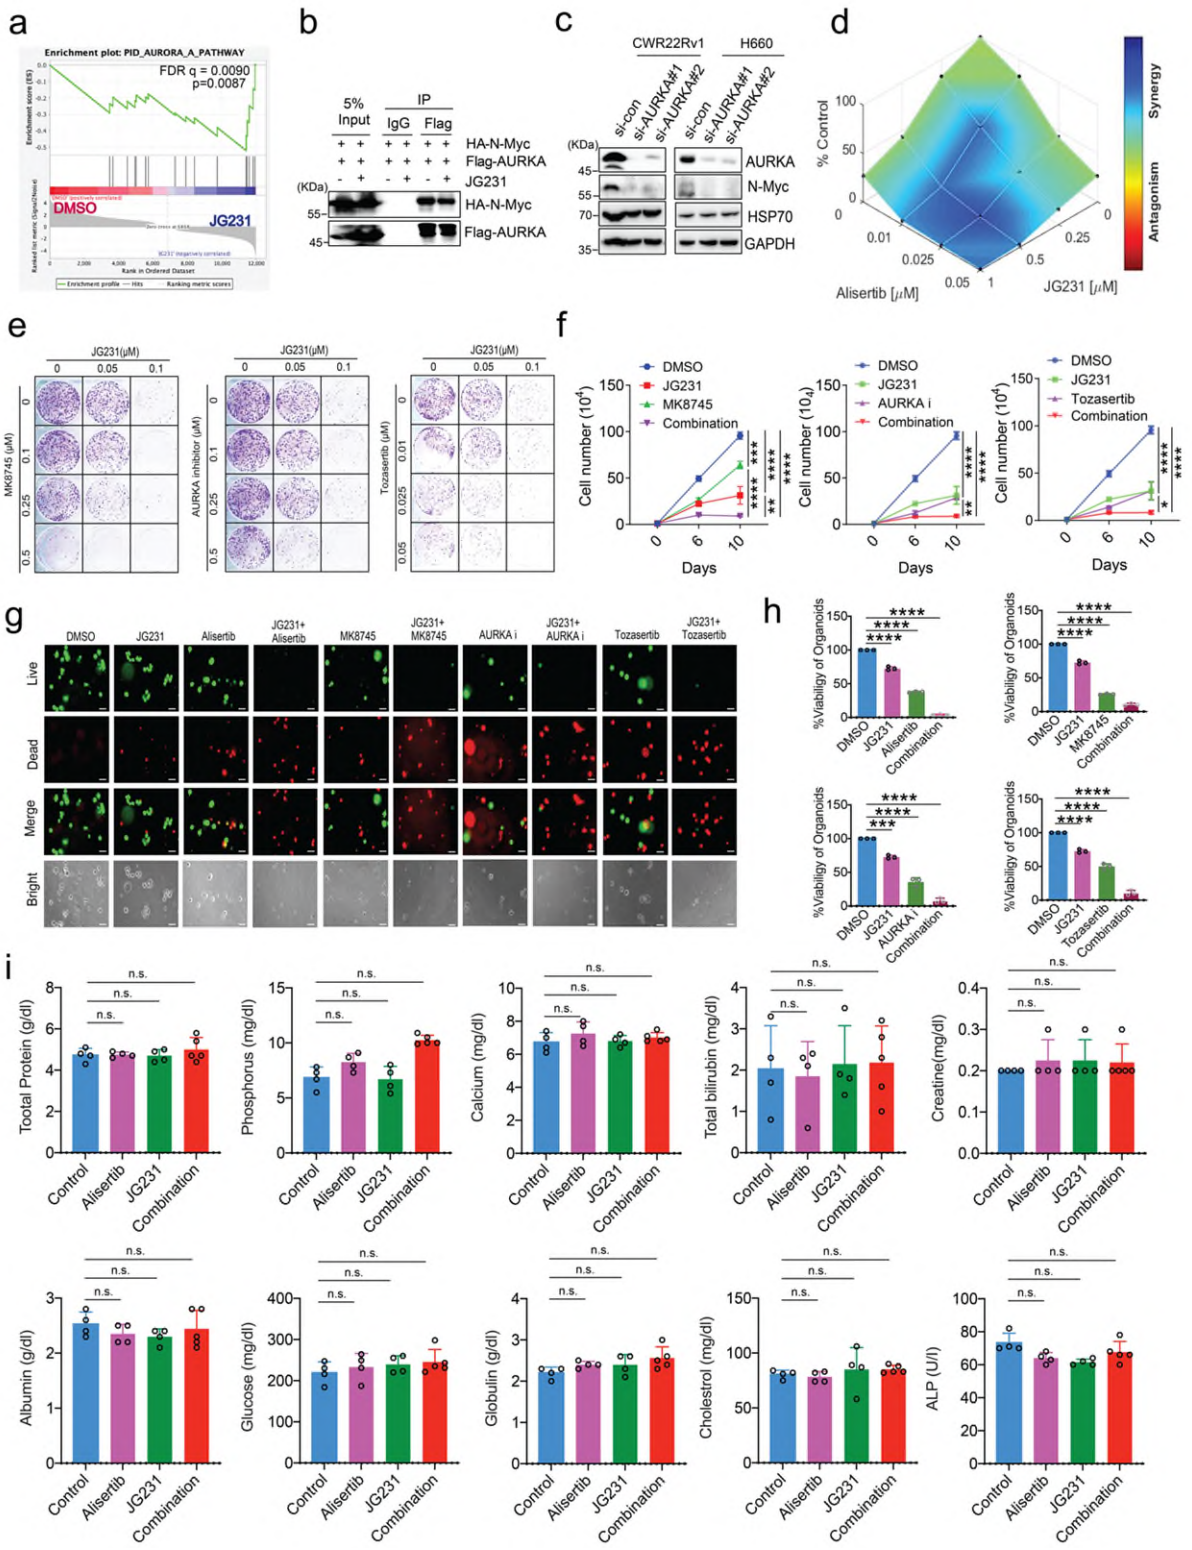



**Supplementary Fig. 7 Dual targeting of HSP70 and AURKA enhances N-Myc degradation and improves treatment in NEPC.** **a** Gene Set Enrichment Analysis (GSEA) showing the enrichment of AURKA pathway in JG231 treated H660 cells. **b** HEK293 cells were co-transfected with HA-N-Myc and Flag-AURKA for 3 days, and then treated with JG231 (2.5  $\mu$ M) for 24 hours. Whole cell lysates were immunoprecipitated with anti-Flag or anti-IgG antibodies and probed for HA-N-Myc and Flag-AURKA, respectively. **c** CWR22Rv1 and H660 cells were transfected with siRNA against AURKA or negative control for 5 days. N-Myc, AURKA, and HSP70 protein expression were assessed. **d** CWR22Rv1 cells were treated with different concentrations of JG231 with or without different concentrations of alisertib for 3 days. The drug synergy distribution map was generated by Combenefit. **e** CWR22Rv1 cells were treated with JG231 alone (0.05 and 0.1  $\mu$ M) with or without MK8745 (0.1, 0.25, and 0.5 $\mu$ M), AURKA inhibitor (0.1, 0.25, and 0.5 $\mu$ M), and tozasertib (0.01, 0.025, and 0.05 $\mu$ M) for two weeks. The colony pictures in each condition were captured. **f** H660 cells were treated with MK8745 (0.5 $\mu$ M), AURKA inhibitor (0.5 $\mu$ M), Tozasertib (0.5 $\mu$ M), JG231 (0.1 $\mu$ M) or the combination for 6-10 days, the cell numbers were counted to determine the cell proliferation (n = 3 samples). **g, h** Organoids generated from H660 patient derived xenograft (PDX) tumors were treated with JG231 alone (0.1 $\mu$ M) with or without alisertib (0.5 $\mu$ M), MK-8745 (0.5 $\mu$ M), AURKA inhibitor (0.5 $\mu$ M), and tozasertib (0.5 $\mu$ M) for 7 days. Cell viability was determined by CellTiter-Glo Luminescent assay (n = 3 samples) and the live-and-dead cells were visualized by immunofluorescence. **i** Drug toxicity tests were conducted by measuring the total protein, phosphorus, calcium, total bilirubin, creatine, albumin glucose, globulin, cholesterol, and alkaline phosphatase (ALP) levels in the serum samples collected from animals treated with alisertib, JG231, combination, or the control (n = 4-5 samples). Results are the mean of three independent experiments ( $\pm$  S.D.). For **f, h, and i**, statistical significance determined by one-way ANOVA with a Tukey multiple-comparison test. n.s.: not significant; \* $p < 0.05$ ; \*\* $p < 0.01$ ; \*\*\* $p < 0.001$ ; and \*\*\*\* $p < 0.0001$ . Source data are provided as a Source Data file.
